# Supplementary material for: Co-Occurrence of Defoliating and Non-Defoliating Pathotypes of Verticillium Dahliae in Field-Grown Cotton Plants in New South Wales, Australia
Source: MDPI journal article supplement (doi:10.3390/plants9060750), 2020-06-15
Supplement: s1 [file s1]

## Supplementary data

**Table S1.** Relative number of D and ND pathotypes<sup>1</sup> recovered from the confirmed co-infected cotton plants in pot trial 1 and 2.

| Co-infected Plant | Inoculated with | No. of D Isolates | No. of ND Isolates |
|-------------------|-----------------|-------------------|--------------------|
| Trial 1 – plant 1 | 19V76 + 19V77   | 1                 | 5                  |
| Trial 1 – plant 2 | 19V76 + 19V77   | 1                 | 5                  |
| Trial 1 – plant 3 | L41 + L42       | 1                 | 2                  |
| Trial 1 – plant 4 | L41 + L42       | 6                 | 1                  |
| Trial 2 – plant 1 | L41 + L42       | 1                 | 6                  |

Seven small sections (woody chips) were excised from the collar regions of the cotton plants and plated out on sPDA for the pathogen recovery. Individual putative cultures of *V. dahliae* recovered from these sections were subjected to pathotyping using duplex PCR [19].
